# Supplementary material for: Complete genome of streamlined marine actinobacterium Pontimonas salivibrio strain CL-TW6T adapted to coastal planktonic lifestyle
Source: BMC Genomics. 2018 Aug 22;19:625. doi: 10.1186/s12864-018-5019-9 (PMC6106888; doi:10.1186/s12864-018-5019-9)
Supplement: Supplementary file 2 — Table S2. Loci from P. salivibrio CL-TW6T grouped by pathway or functional category with vertical indexes: Loci involving light, Pathways for synthesizing isoprenoid products, Pathways of carbohydrate utilization and synthesis, Genes related to planktonic vs. biofilm lifestyle, Sigma factors and regulators, Systemic regulators in P. salivibrio CL-TW6T, Redox systems, Proteins involved in heat and cold shock, Genes related to osmotic stress, Possible exporters in P. salivibrio CL-TW6T, ABC importers, Amino acid biosynthesis and catabolism pathways, Miscellaneous paths, Cell wall synthesis, and Lipid pathways. (XLS 148 kb) [file 12864_2018_5019_MOESM2_ESM.xls]

## Sheet: Legend
Table S2. Loci from P. salivibrio CL-TW6T grouped by pathway or functional category with vertical indexes.
LEGEND
Annotated genes of P. salivibrio CL-TW6T are listed clustered by pathway or other relevant grouping as indicated by the tab names
EC/TC # is the database number in the KEGG or TCDB database.
Vert. index is the number of the top 10 BlastP matches that are to members of Microbacteriaceae.
The blast library was composed of completely sequenced genomes plus Yonghaparkia, acMicro-4, and MedAcidi-G1
A high vertical index (8-10) indicates that the gene apparently descended into P. salivibrio form its Microbacteriaceae ancestors.
A low vertical index (0-2) indicates that the gene was acquired by horizontal transfer from some source outside of Microbacteriaceae.
An intermediate vertical index could either mean vertical descent with only some of Microbacteriaceae keeping the gene,
horizontal transfer into a subset of Microbacteriaceae, or horizontal transfer from Microbacteriaceae to another taxon, thus displacing members of Microbacteriaceae from the top of the BlastP listing.

## Sheet: light
Loci involving light
	Locus Tag	Vert. Index
Bacteriorhodopsin	C3B54_11643	3
deoxyribodipyrimidine photo-lyase (4 paralogs)
	C3B54_11283	7	The only one with the N-terminal auxilliary chromophore that improves light gathering (Klar et al., 2006)
	C3B54_11849	0
	C3B54_11872	0
	C3B54_111519	7
Uvr ABC exinuclease
Uvr C	C3B54_111064	9
Uvr A	C3B54_111065	10
Uvr B	C3B54_111066	10
Reference
Klar T, Kaiser G, Hennecke U, Carell T, Batschauer A, Essen LO. Natural and non-natural antenna chromophores in the DNA photolyase from Thermus Thermophilus. Chembiochem 2006; 7(11):1798-806. https://doi.org/10.1002/cbic.200600206.

## Sheet: isoprenoid
Pathways for synthesizing isoprenoid products
	EC #	locus tag	vert. index
Isoprene pathway: MEP/DOXP pathway				From glyceraldehyde-3-P and pyruvate
1-deoxy-D-xylulose-5-phosphate synthase	EC 2.2.1.7	C3B54_11942	10	Two close homologs in H37Rv are Rv2684c and Rv3379c
1-deoxy-D-xylulose-5-phosphate reductoisomerase	EC 1.1.1.267	C3B54_11619	9
2-C-methyl-D-erythritol 4-phosphate cytidylyltransferase	EC 2.7.7.60	C3B54_111702	7	N-ter domain
4-diphosphocytidyl-2-C-methyl-D-erythritol kinase	EC 2.7.1.148	C3B54_11499	3
2-C-methyl-D-erythritol 2,4-cyclodiphosphate synthase	EC 4.6.1.12	C3B54_111702	7	C-ter domain
(E)-4-hydroxy-3-methylbut-2-enyl-diphosphate synthase	EC 1.17.7.3	C3B54_11621	7
4-hydroxy-3-methylbut-2-enyl diphosphate reductase	EC 1.17.7.4	C3B54_11535	10	makes isopentenyl-PP and dimethylallyl-PP
isopentenyl-diphosphate delta-isomerase	EC 5.3.3.2	C3B54_11113	8	isomerizes isopentenyl-PP and dimethylallyl-PP
geranylgeranyl diphosphate synthase, class III, multifunctional		C3B54_11969	6
	EC 2.5.1.1			makes geranyl-PP
	EC 2.5.1.10			makes farnesyl-PP
	EC 2.5.1.29			makes geranylgeranyl-PP
Carotene synthesis
phytoene synthase	EC 2.5.1.32	C3B54_11112	10	makes phytoene from geranylgeranyl-PP
phytoene desaturase (five desaturation steps)	EC 1.3.99.30	C3B54_11111	9	And/or paralogs _1159, _11215; makes lycopene
C50 carotenoid epsilon cyclase
		C3B54_11109	5
		C3B54_11119	8	makes epsilon carotene
C50 carotenoid beta cyclase
		C3B54_11885	0
		C3B54_11886	0	converts epsilon carotene to alpha carotene, or lycopene to beta carotene
Retinal synthesis
beta-carotene 15,15'-dioxygenase	EC 1.13.11.63	C3B54_11887	0	makes retinal from beta carotene
Peptidoyglycan carrier synthesis
short-chain Z-isoprenyl diphosphate synthase	EC 2.5.1.68	C3B54_11529	10	from geranyl-PP
(omega E, polyZ)-decaprenyl diphosphate synthase	EC 2.5.1.86	C3B54_11818	8
undecaprenyl/(omega E, polyZ)-decaprenyl diphosphatase	EC 3.6.1.27	C3B54_111024	5	Also required for recycling used carrier

## Sheet: carbo paths
Pathways of carbohydrate utilization and synthesis
Glucose oxidataion
	EC number	Locus tag	Vert. Index	Comment
Glycolysis (Embden-Meyerhof-Parnas) pathway
glucose-6-phosphate isomerase	EC 5.3.1.9	C3B54_111051	3
6-phosphofructokinase	EC 2.7.1.11	C3B54_11213	8
fructose-bisphosphate aldolase	EC 4.1.2.13	C3B54_11536	10
triosephosphate isomerase	EC 5.3.1.1	C3B54_111057	8
glyceraldehyde 3-phosphate dehydrogenase	EC 1.2.1.12	C3B54_111059	4
phosphoglycerate kinase	EC 2.7.2.3	C3B54_111058	9
2,3-bisphosphoglycerate-dependent phosophoglycerate mutase	EC 5.4.2.11	C3B54_111708	4
enolase	EC 4.2.1.11	C3B54_11515	7
pyruvate kinase	EC 2.7.1.40	C3B54_111074	10	makes pyruvate
pyruvate dehydrogenase complex
pyruvate dehydrogenase, E1	EC 1.2.4.1	C3B54_11902	10
dihydrolipoyl transacetylase, E2	EC 2.3.1.12	C3B54_11922	5
dihydrolipoyl dehydrogenase, E3	EC 1.8.1.4	C3B54_11923	9	makes acetyl-CoA
Pentose phosphate pathway
Oxidative branch
glucose-6-phosphate dehydrogenase	EC 1.1.1.49	C3B54_111052	9
6-phosphogluconolactonase	EC 3.1.1.31	C3B54_111054	8
6-phosphogluconate dehydrogenase	EC 1.1.1.44	C3B54_11508	5
Nonoxidative branch
ribose 5-phosphate isomerase	EC 5.3.1.6	C3B54_11737	3
ribulose-5-phosphate 3-epimerase	EC 5.1.3.1	C3B54_111089	10
transketolase	EC 2.2.1.1	C3B54_111049	8
transaldolase	EC 2.2.1.2	C3B54_111050	3
TCA cycle
citrate synthase	EC 2.3.3.1	C3B54_111563	10
aconitase	EC 4.2.1.3	C3B54_11941	6
isocitrate dehydrogenase (NADP)	EC 1.1.1.42	C3B54_11373	9
alpha ketoglutarate dehydrogenase complex
E1	EC 1.2.4.2	C3B54_111467	10	C-ter. domain
E2	EC 2.3.1.6	C3B54_111467	10	N-ter. domain
dihydrolipoyl dehydrogenase, E3	EC 1.8.1.4	C3B54_11923	9
succinyl-CoA synthetase complex (NTP-producing)	EC 6.2.1.5
succinyl-CoA synthetase alpha subunit		C3B54_11368	2
succinyl-CoA synthetase beta subunit		C3B54_11367	6
succinate dehydrogenase complex (menaquinone-reducing)	EC 1.3.5.1
flavoprotein subunit		C3B54_111674	9
iron-sulfur subunit		C3B54_111675	10
cytochrome b subunit		C3B54_111673	2
membrane-anchoring subunit		C3B54_111674	9
fumarase	EC 4.2.1.2	C3B54_11531	9
malate dehydrogenase (menaquinone-reducing)	EC 1.1.5.4	C3B54_111725	9
succinate-semialdehyde dehydrogenase	EC 1.2.1.79	C3B54_111501	5	alpha ketoglutarate bypassa
aTian et al., 2005 indicate that this gene is required in H37Rv to complete the TCA cycle
Respiratory chain
Menaquinone reduction
NADH dehydrogenase	EC 1.6.5.11	C3B54_11519	10	NADH used to reduce menaquinone; in contrast to mitochondrial complex I, no protons are pumped
succinate dehydrogenase complex	EC 1.3.5.1	See TCA cycle		Electron directly passed from TCA cycle used to reduce menaquinone; in contrast to mitochondrial complex II, no protons are pumped
malate dehydrogenase	EC 1.1.5.4	C3B54_111725	9	Electron directly passed from TCA cycle used to reduce menaquinone; in contrast to mitochondrial chain, no NADH as an intermediate, and no protons are pumped
glycerol-3-phosphate dehydrogenase (FAD)	EC 1.1.5.3	C3B54_111526	8	glycerol catabolism
aldose dehydrogenase		C3B54_11244	0	substrate unknown
Menaquinone oxidation
bc1 complex				pumps protons and passes electron directly to aa3 complex; Unlike mitochondrial complex III, there is no soluble cyt c
cytochrome b subunit		C3B54_111003	10
iron-sulfur subunit		C3B54_111004	10
cytochrome c subunit		C3B54_111005	6
aa3 complex	EC 1.9.3.1			pumps protons and reduces O2; unlike mitochondrial complex IV, there is no soluble cyt c, so not strictly a cyt c oxidase
complex subunit 1		C3B54_11999	10
subunit 2		C3B54_11998	8
subunit 3		C3B54_111006	6
subunit IV		C3B54_111000	10
bd complex	EC 1.10.3.10			alternative low O2 option to bc1-aa3 chain
subunit d		C3B54_11787	8
subunit b		C3B54_11788	8
ATP F0/F1 synthase
F1 epsilon subunit		C3B54_111426	10
F1 beta subunit	EC 3.6.3.14	C3B54_111427	10
F1 gamma subunit		C3B54_111428	9
F1 alpha subunit	EC 3.6.3.14	C3B54_111429	10
F1 delta subunit		C3B54_111430	10
F0 B subunit		C3B54_111431	6
F0 C subunit		C3B54_111432	6
F0 A subunit		C3B54_111433	7
cytochrome assembly
cytochrome c-type biogenesis protein CcsB		C3B54_113	10	required for heme attachment
cytochrome c biogenesis protein		C3B54_114	10
cytochrome c-type biogenesis protein		C3B54_115	8
Cytochrome oxidase assembly protein ShyY1 (two paralogs)
		C3B54_11361	9
		C3B54_111041	7
cytochrome c oxidase assembly protein subunit 15		C3B54_111047	10	assembly of ox. phos. complex IV
Gluconeogenesis
pyruvate, water dikinase	EC 2.7.9.2	C3B54_11119	0	pyruvate directly -> PEP
phosphoenolpyrivate carboxykinase	EC 4.1.1.32	C3B54_111454	4	oxaloacetate -> PEP
fructose-1,6-bisphosphatase	EC 3.1.3.11	C3B54_11537	10
Reference
Tian J, Bryk R, Itoh M, Suematsu M, Nathan C. Variant tricarboxylic acid cycle in Mycobacterium tuberculosis:
identification of alpha-ketoglutarate decarboxylase. Proc Natl Acad Sci USA 2005;102(30):10670-5.

## Sheet: Planktonic
Genes related to planktonic vs. biofilm lifestyle
	EC/TC #	Locus Tag	Vert. Index
no flagellar genes
no quorum signal synthesis genes identified
no diguanylate cyclase gene (generator of master bioflim signal)
Quorum sensing
AI-2 quorum sensing ABC transport system substrate-binding protein, LsrB		C3B54_111259	1
AI-2 ABC permease LsrC/D		C3B54_111257	1
AI-2 ABC permease LsrC/D		C3B54_111256	1
AI-2 ABC ATP-binding protein, LsrA		C3B54_111258	1
AI-2 kinase, LsrK	EC 2.7.1.189	C3B54_111261	0
LsrG AI-2 processing enzyme		C3B54_111249	0
autoinducer-2 (AI-2) aldolase, LsrF	EC 2.4.1.-	C3B54_111264	0
DNA-binding transcriptional regulator LsrR, DeoR family		C3B54_111262	0
transcription regulator		C3B54_111260a	1
aThis factor may play some auxilliary role in the AI-2 response. It is in the position and of the right family to be the LsrR regulator of AI-2 quorum sensing.
Fimbriae
Fimbriae major structural protein, Flp		C3B54_111490	5
Fimbriae protein, TadE/F		C3B54_111489	4
Fimbriae protein, TadE/F		C3B54_111488	5
Fimbriae protein, TadE/F		C3B54_111487	7
Fimbriae secretion channel subunit C, TadC		C3B54_111510	4
Fimbriae secretion channel subunit B, TadB		C3B54_111511	4
Fimbriae subunit secretion ATPase CpaF, TadA		C3B54_111512	7
Fimbriae assembly protein, RcpC		C3B54_111606	2
Fimnbriae localization ATPase, TadZ		C3B54_111604	3
Fimbriae subunit secretion ATPase, CpaF, TadA		C3B54_11390	9
Fimbriae secretion channel subunit B, TadB		C3B54_11391	7
Fimbriae major structural protein, Flp		C3B54_11392	6
Fimbriae protein, TadE/F		C3B54_11393	1
Fimbriae protein, TadE/F		C3B54_11394	3
leader peptidase, CpaA, TadV	EC 3.4.23.43	C3B54_11302	2

## Sheet: Sigma
Sigma Factors and Regulators
	Locus Tag	Vert. Index
Primary sigma factor, SigA	C3B54_11926	8
Stress sigma factor, SigH	C3B54_111469	3
Anti-SigH factor	C3B54_111468	10
Anti-SigH cleavage factor	C3B54_11673	5

## Sheet: Two component & toxin antitoxin
Systemic Regulators in P. salivibrio CL-TW6: Two component systems and Toxin/antitoxin systems including stringent control
Two component systems
Sensor His kinase	Vertical index	Response regulator	Vertical index
C3B54_11169	5	C3B54_11168	7	TcrXY
C3B54_11424	1	C3B54_11425	1
C3B54_11432	6	C3B54_11433	10	PhoRP (mycobacterial version of PhoRB)
C3B54_11825	5
C3B54_11851	0	C3B54_11852	1
C3B54_111151	0	C3B54_111152	2
C3B54_111451	1	C3B54_111452	1
C3B54_111603	10	C3B54_111071	10	Pairing inferred by characterization of orthologs in H37Rv
C3B54_111613	8	C3B54_111614	9	MtrAB
C3B54_111706	10	C3B54_111705	3	SenX3
C3B54_11740a	2	C3B54_11740	5
		C3B54_111397	2
Toxin/Antitoxin Systems
Toxin	Vertical Index	Antitoxin	Vertical Index
PIN/Vap ribonuclease
C3B54_11463	0	C3B54_11464	1
C3B54_11690	1	C3B54_11689	1
C3B54_111228	0	C3B54_111227	0
C3B54_111231	0	C3B54_111233	0
		C3B54_111232	0	possible duplicate pseudogene of _111233
C3B54_111241	0	C3B54_111240	0
C3B54_111333	0	C3B54_111334	0
C3B54_111495	1	C3B54_111494	0
C3B54_111449	0	C3B54_111450	0
Hig/Rel ribonuclease
C3B54_11479	1	C3B54_11480	1
C3B54_111213	0	C3B54_111214	0
C3B54_111404	0	C3B54_111403	0
C3B54_111198	0	C3B54_111197	0
		C3B54_11540	0
		C3B54_11541	1
FIC/DOC adenylation
C3B54_11200	2
C3B54_11542	0
C3B54_11668	0	C3B54_11669	0
		C3B54_111229	0
Maz/Pem ribonuclease
C3B54_111234	0	C3B54_111235	1
C3B54_111375	1	C3B54_111376	0
AbiE nucleotidyl transferase
C3B54_11398	0	C3B54_11399	0
C3B54_11858	1	C3B54_11857	1
C3B54_11708	1	C3B54_11709	0
C3B54_111378	0	C3B54_111377	0
C3B54_11404	1	C3B54_11403	1	detected by hhpred but not hmmer
		C3B54_111119	0
		C3B54_111239	1
HipAB ser/thr kinase of tRNA synthetase
C3B54_11252	0	C3B54_11253	0
C3B54_111596	5	C3B54_111595	3
ParDE ribonuclease
C3B54_1156	0	C3B54_1157	0
Stringent control
		Locus Tag	Vert. Index
(p)ppGpp synthetase		C3B54_111120	10
polyphosphate kinase		C3B54_111711	9
MazG		C3B54_11513	7
Functions related to stringent control in H37Rv not found in P. salivibrio
ppK2, ppx1, ppx2, rbpA

## Sheet: redox
Redox systems
	EC/TC #	Locus Tag	Vert. Index
Small molecule reducing agents
CoA disulfide reductase		C3B54_111410	3	Maintains high concentration of CoA vs CoA disulfide
Thioredoxin reducing system
thioredoxin reductase (NADPH)	EC 1.8.1.9	C3B54_11147	10
thioredoxin		C3B54_11146	8
Systems including thioredoxin-like proteins not engaged in trafficking reducing power
Periplasmic disufide oxidation system
Periplasmic thiol-disulfide interchange protein		C3B54_116	9
periplasmic protein disulfide oxidase		C3B54_111696	6	oxidizes protein disulfide bonds during folding in periplasm
Vitamin K epoxide reductase like membrane proteins		C3B54_11760	7	Reoxidizes periplasmic disulfide oxidase, and passes electrons to e transport chain
Non-redox thioredoxin-like proteins
Co-Chaperone of DnaK		C3B54_11616	7	Does not have the active site disulfide
Thioredoxin paralogs of unknown function
thioredoxin		C3B54_1170	4
thioredoxin		C3B54_11294	2
thioredoxin		C3B54_11636	2
thioredoxin		C3B54_111353	3
thioredoxin		C3B54_111399	5	C-ter domain
Oxidative stress
catalase-peroxidase	EC 1.11.1.21	C3B54_11257	0
superoxide dismutase	EC 1.15.1.1	C3B54_111060	5
peptide-methionine (S)-S-oxide reductase	EC 1.8.4.11	C3B54_11728	9
peptide-methionine (R)-S-oxide reductase	EC 1.8.4.12	C3B54_11416	8
organic hydroperoxide resistance protein, OsmC		C3B54_111401	4
organic hydroperoxide reductase, Ohr		C3B54_111413	0
acyl hydroperoxidase reductase		C3B54_111584	0
peroxiredoxin Q/BCP	EC 1.11.1.15	C3B54_11558	3
peroxiredoxin Q/BCP	EC 1.11.1.15	C3B54_111600	4
Efflux pump, MATE family	TC 2.A.66	C3B54_11208	10	Exports oxidatively damaged molecules
Dps DNA-binding ferritin-like protein (oxidative damage protectant)		C3B54_11254	10	May be pseudogene
MazG		C3B54_11513	7	Known to be involved in oxidative stress response in H37Rv
3-mercaptopyruvate sulfurtransferase		C3B54_11947	5	Produces H2S which protects against certain oxidative challenges
HxlR transcription factor		C3B54_11711	0	Senses oxidative stress
WhiB transcription factor		C3B54_111621	4	Senses oxidative stress
WhiB1 transcription factor		C3B54_111602	5	Senses oxidative stress
transcription-repair coupling factor		C3B54_11512	10
Adenine glycosylase, repair enzyme, MutY		C3B54_11628	0
Possible O6-alkylguanine repair protein		C3B54_111319	0
8-oxo-GDP phosphatase		C3B54_111178	6
DNA-3-methyladenine glycosylase II		C3B54_11262	0
Formamidopyrimidine-DNA glycosylase		C3B54_11738	8
Formamidopyrimidine-DNA glycosylase		C3B54_11584	10

## Sheet: heat,cold
Proteins involved in heat and cold shock
		Locus Tag	Vert. Index
Heat Shock
Hsp70 operon
DnaK		C3B54_11106	10
GrpE		C3B54_11105	5
DnaJ		C3B54_11104	10
HspR		C3B54_11103	10
ClpB		C3B54_11102	9
Hsp65 regulon
Heat shock repressor HrcA		C3B54_11808	10
DnaJ2		C3B54_11809	10
GroEL		C3B54_11423	8
GroES		C3B54_11352	6
Other
Lon		C3B54_11545	3
SdrC (DegP)		C3B54_111540	9
Heat shock membrane protease HtpX		C3B54_11522	5
NAD(P)H-hydrate repair enzyme, Nnr		C3B54_111463	10
no homologs of H37Rv Acr (hspX), or Acr2
no homologs of hsp15 (S4 recycling factor)
Cold Shock
Cold shock protein, RNA chaperone, CspA		C3B54_11653	1
Cold shock protein, RNA chaperone, CspB		C3B54_11437	10
Putative cold shock ATP-dependent RNA helicase		C3B54_111552	10	Ortholog of B. subtilus CshA
ATP-dependent RNA helicase		C3B54_11870	6
ATP-dependent RNA helicase		C3B54_111537	10
ribosomal-binding protein RbfA		C3B54_11626	5	Aids ribosome assembly at low temperature
NusA		C3B54_11623	10
Polyribonucleotide phosphorylase		C3B54_11642	10
Fatty acid desaturase		C3B54_11874	6

## Sheet: osmotic stress
Genes related to osmotic stress
	TCDB #	Locus	Vert. index	Notes
Na+/H+ antiporter				Swartz et al., 2005
subunit A	TC 2.A.63	C3B54_11406	1
subunit C		C3B54_11407	1
subunit D		C3B54_11408	1
subunit E		C3B54_11409	1
subunit F		C3B54_11410	1
subunit G		C3B54_11411	1
K+ (or Na+) exporter, KefB	TC 2.A.37	C3B54_11778	0	Ferguson et al., 2000
Trk possassium uptake				Harms et al., 2001
TrkA	TC 2.A.38	C3B54_11290	10
TrkH		C3B54_11291	10
Voltage gated K+ channel	TC 1.A.1	C3B54_111583	1
Mechanosensitive channels	TC 1.A.23			Perozo and Rees, 2003
small conductance channel		C3B54_11734	8
small conductance channel		C3B54_11889	1
No large conductance channel detected.
Trehalose synthesis
trehalose 6-phosphate synthase	EC 2.4.1.15	C3B54_111578	9	From UDP-glucose and glucose-6-P
trehalose 6-phosphate phosphatase	EC 3.1.3.12	C3B54_111577	7
Trehalose breakdown
maltose alpha-D-glucosyltransferase	EC 5.4.99.16	C3B54_111033	8
alpha-glucosidase	EC 3.2.1.20	C3B54_111762	10
References
Ferguson GP, Battista JR, Lee AT, Booth IR. Protection of the DNA during the exposure of Escherichia coli cells to a toxin metabolite: the role of the KefB and KefC potassium channels. Mol. Microbiol 2000; 35:113-122
Swartz TH, Idewada S, Ishikawa O, Ito M, Krulwich TA. The Mrp system: a giant among monovalent cation/proton antiporters. Extremophiles 2005; 9:345-54.
Harms C, Domoto Y, Celik C, Rahe E, Stumpe S, Schmid R, Nakamura T, Bakker EP. Identification of the ABC protein SapD as the subunit that confers ATP dependence to the K+-uptake systems TrkH and TrkG from Escherichia coli K-12. Microbiology 2001; 147:2991-3003.
Perozo E, Rees DC. Structure and methanism in prokaryotic mechanosensitive channels. Curr Opin Struct Biol 2003; 31(4):432-42.

[truncated: 6 more sheets: exporters, ABC, AA paths, misc. paths, Cell Wall, lipids]
